# Supplementary material
Source: PubMed Central journal article supplement (PMC5464448)

Fig. S1

A

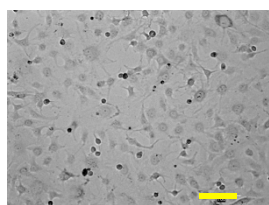

Day 1, pH 7.8

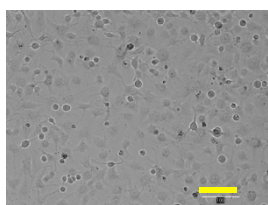

Day 2, pH 7.5

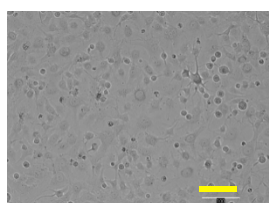

Day 4, pH 7.2

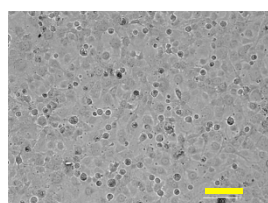

Day 6, pH 7.0

B

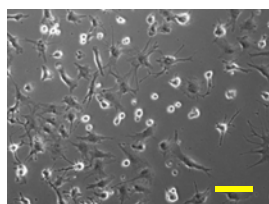

DMEM-FBS, pH 7.8

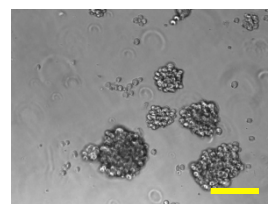

Conditioned DMEM  
pH 6.5

Fig. S2

A

### GSCs 157

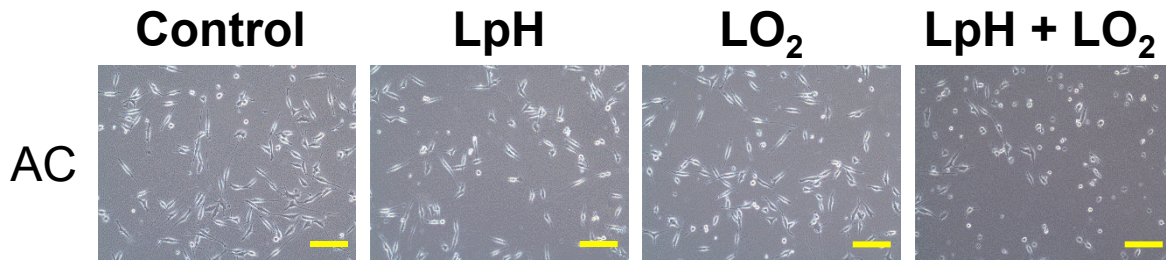

pH      7.4      7.0      7.4      6.6

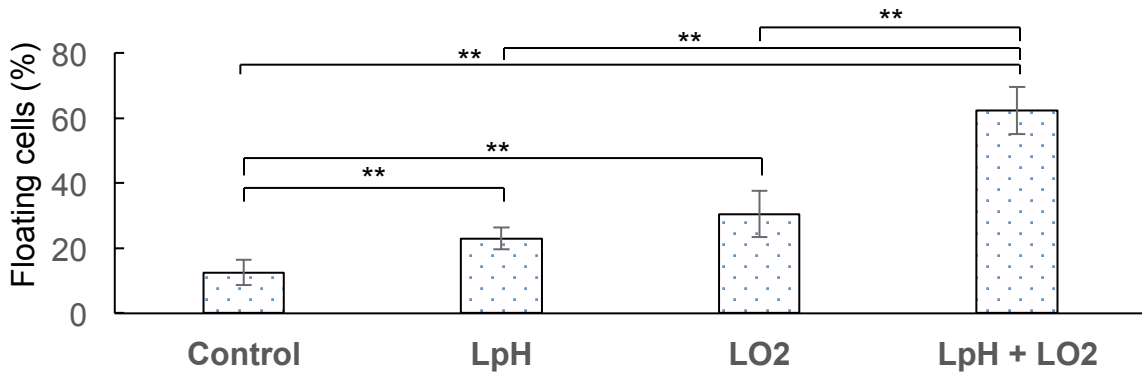

B

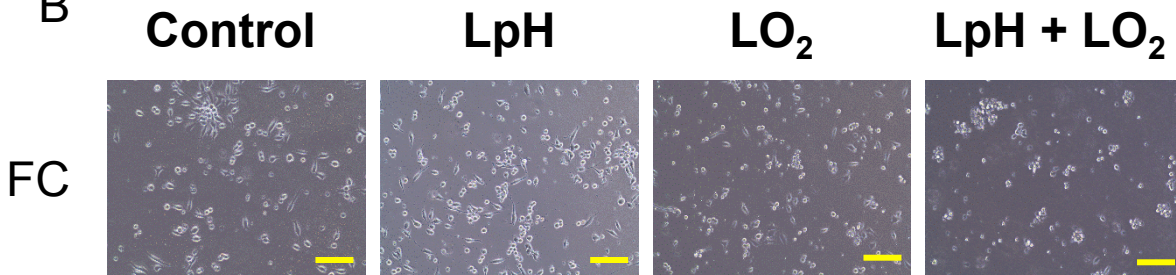

C

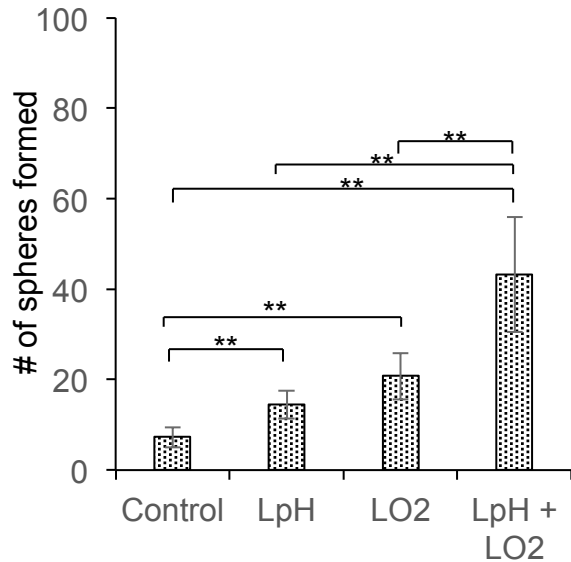

D

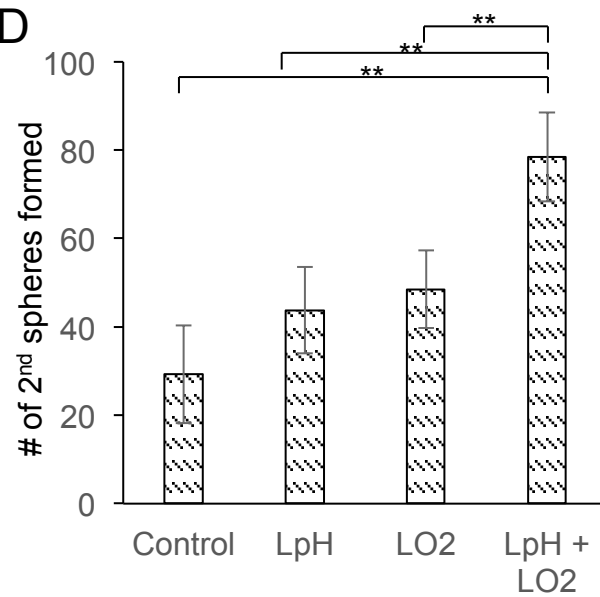

Fig. S3

**BT01**

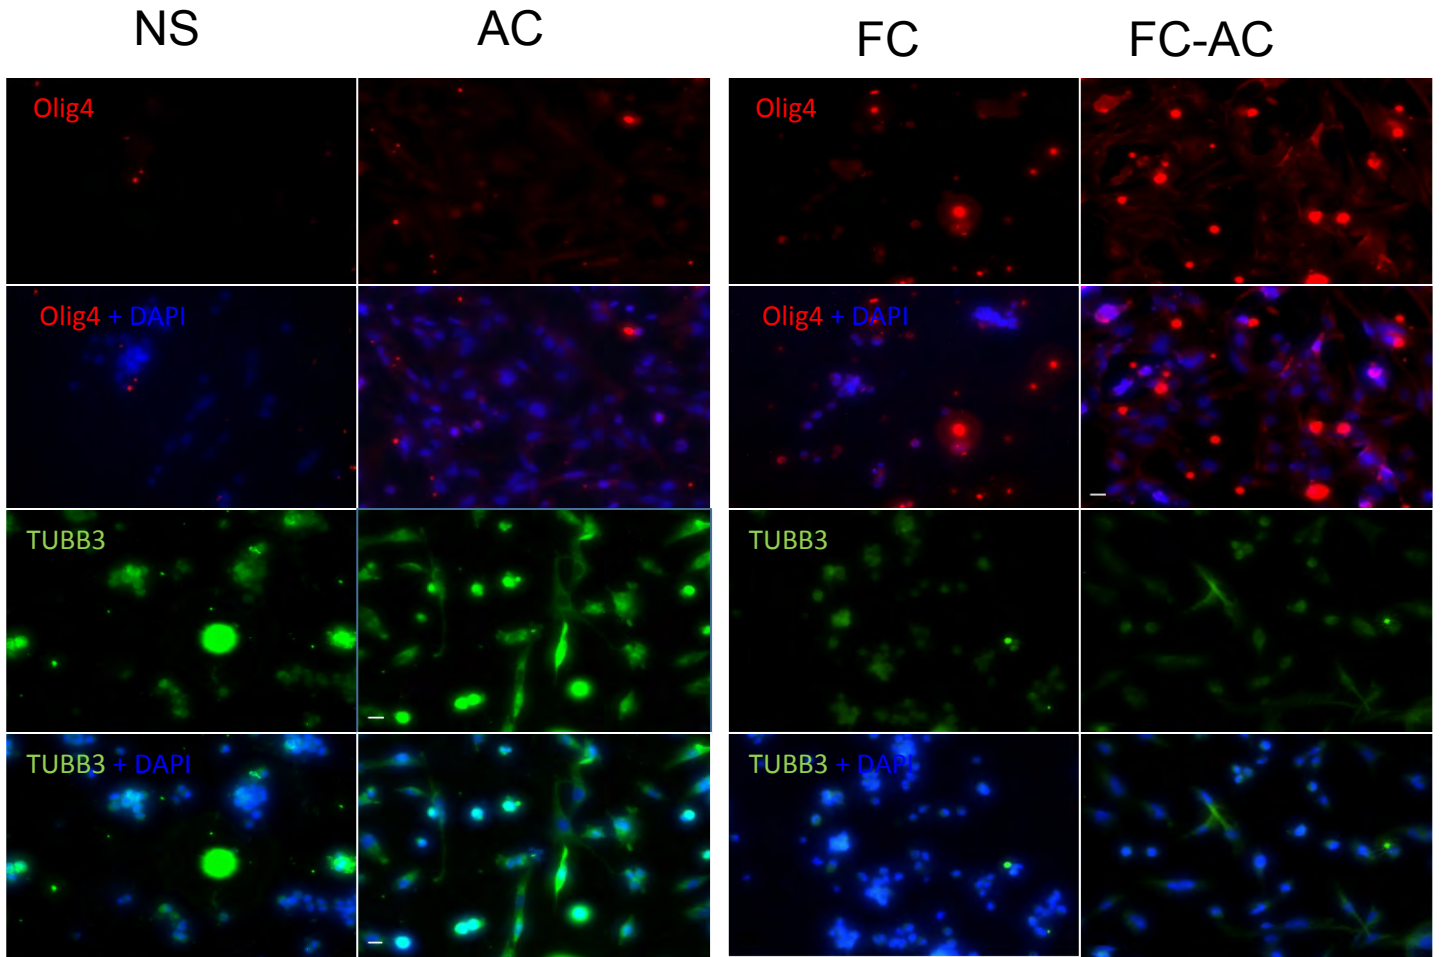



Fig. S5

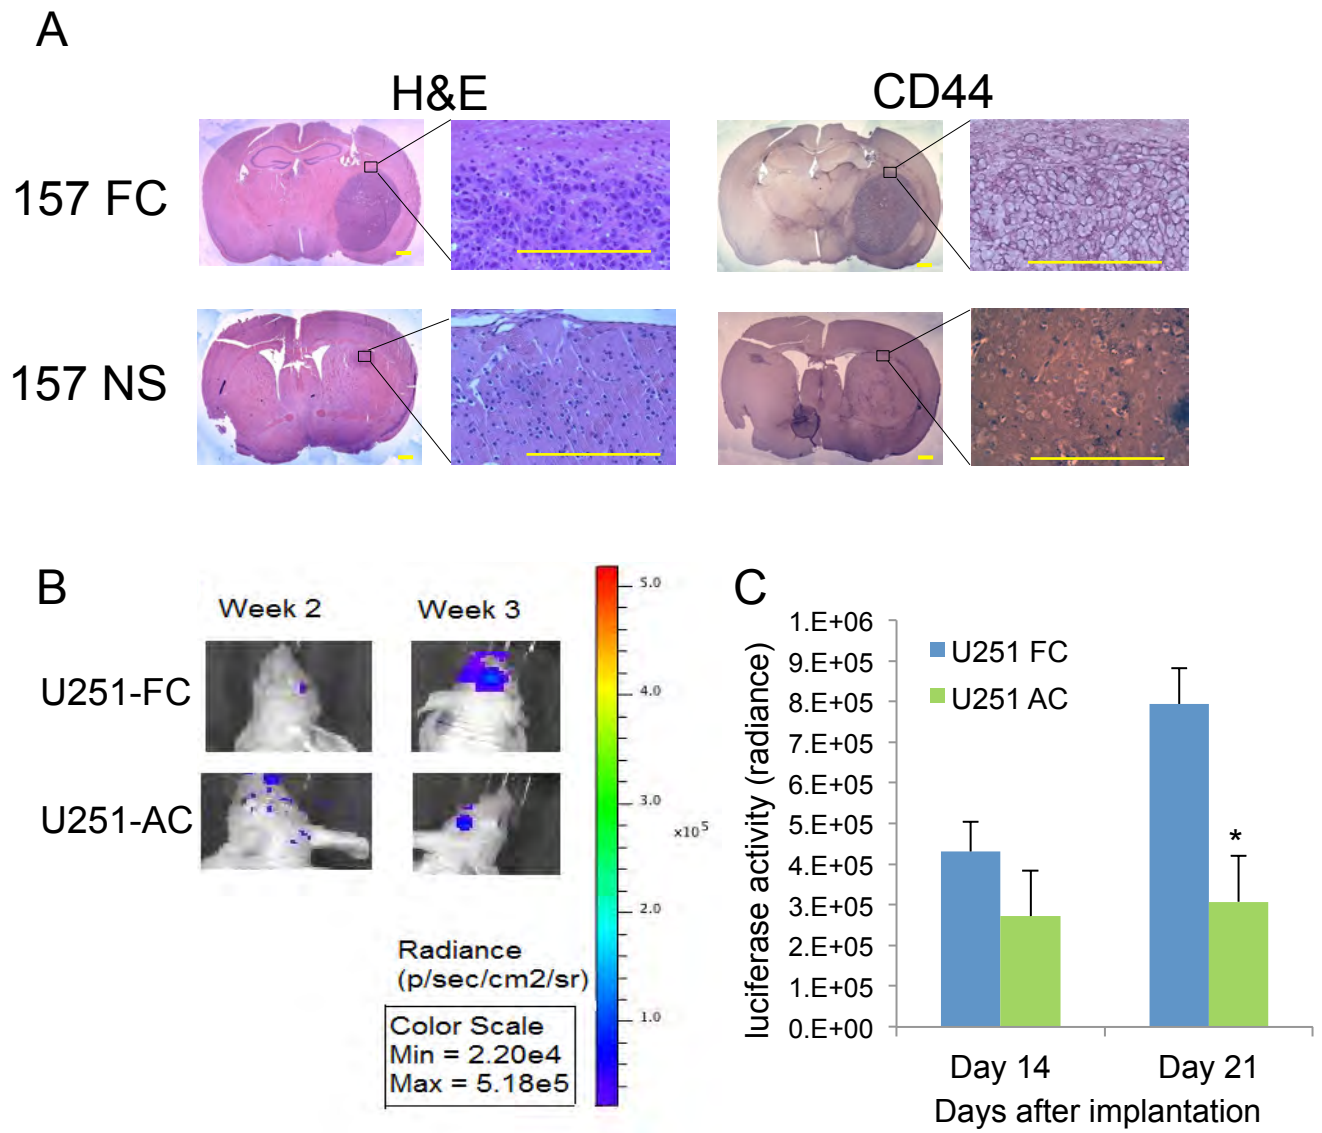

Fig. S6

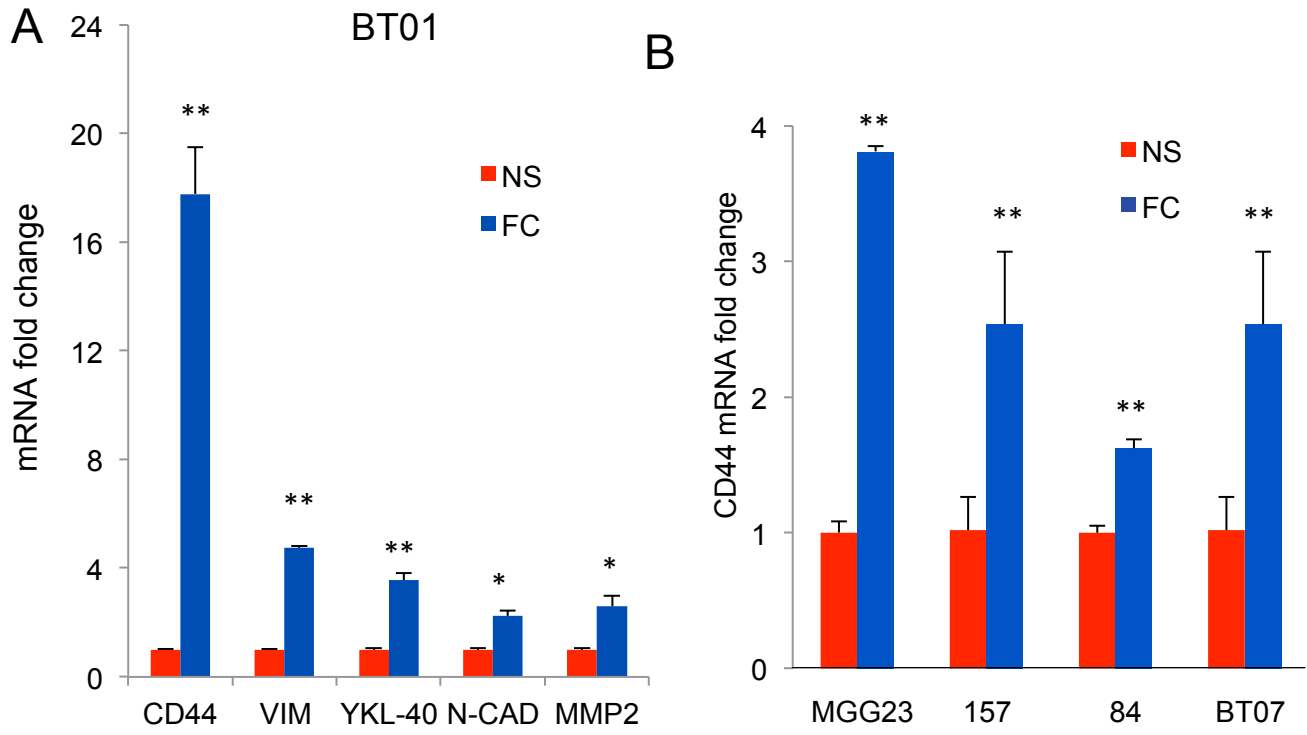

Fig. S7

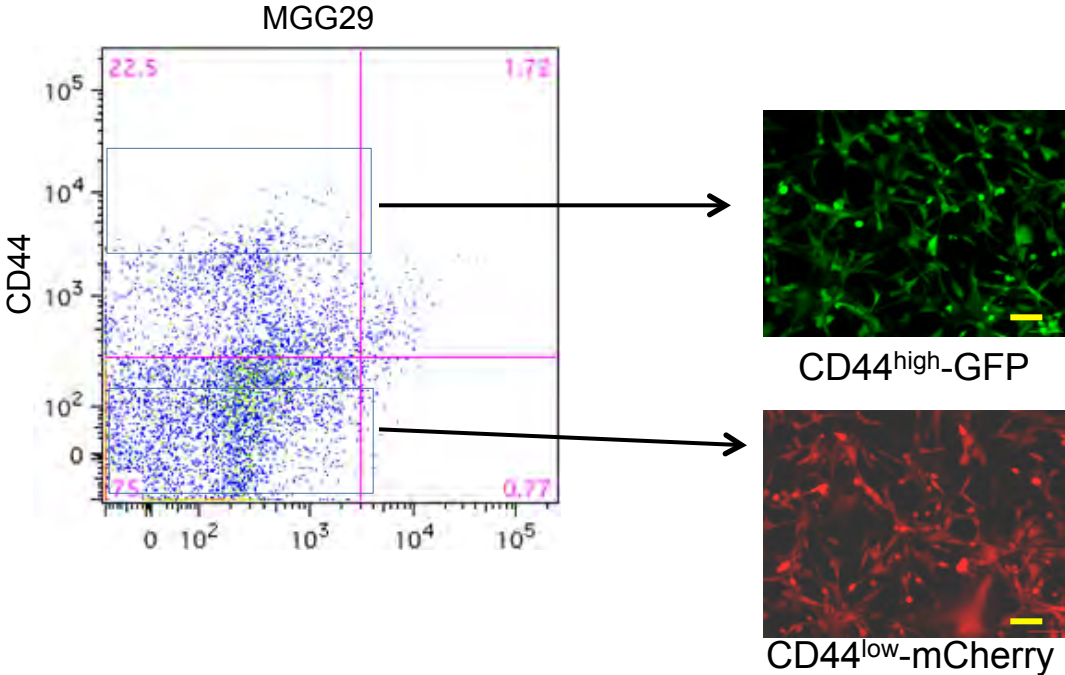



Fig. S8

NS + Synthemax

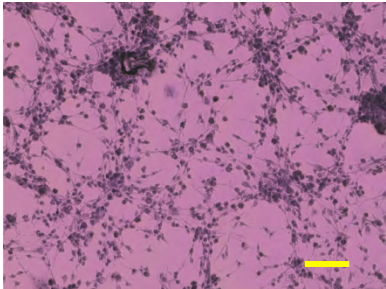

FC + Synthemax

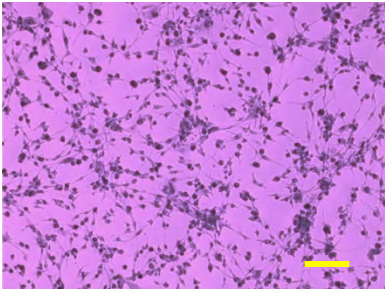



Fig. S9

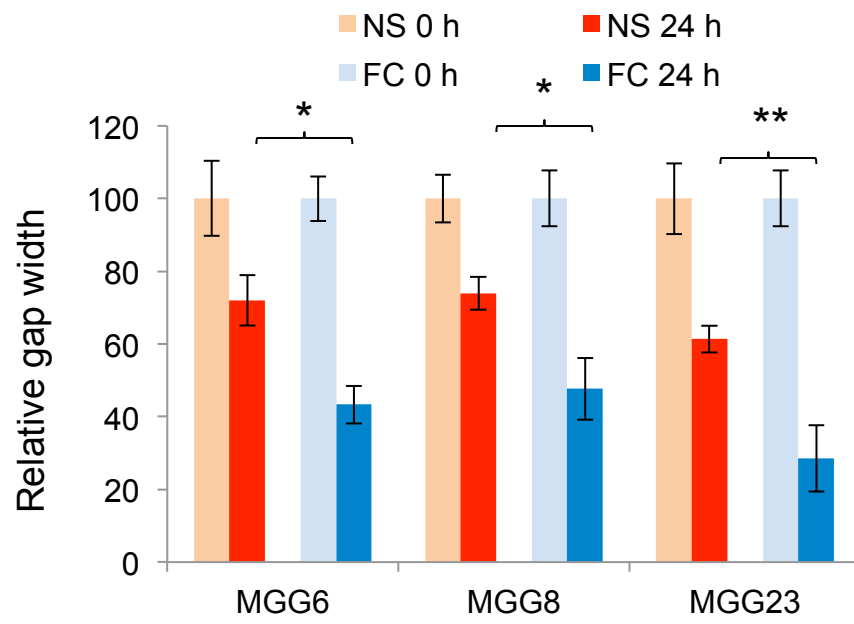

Fig. S10

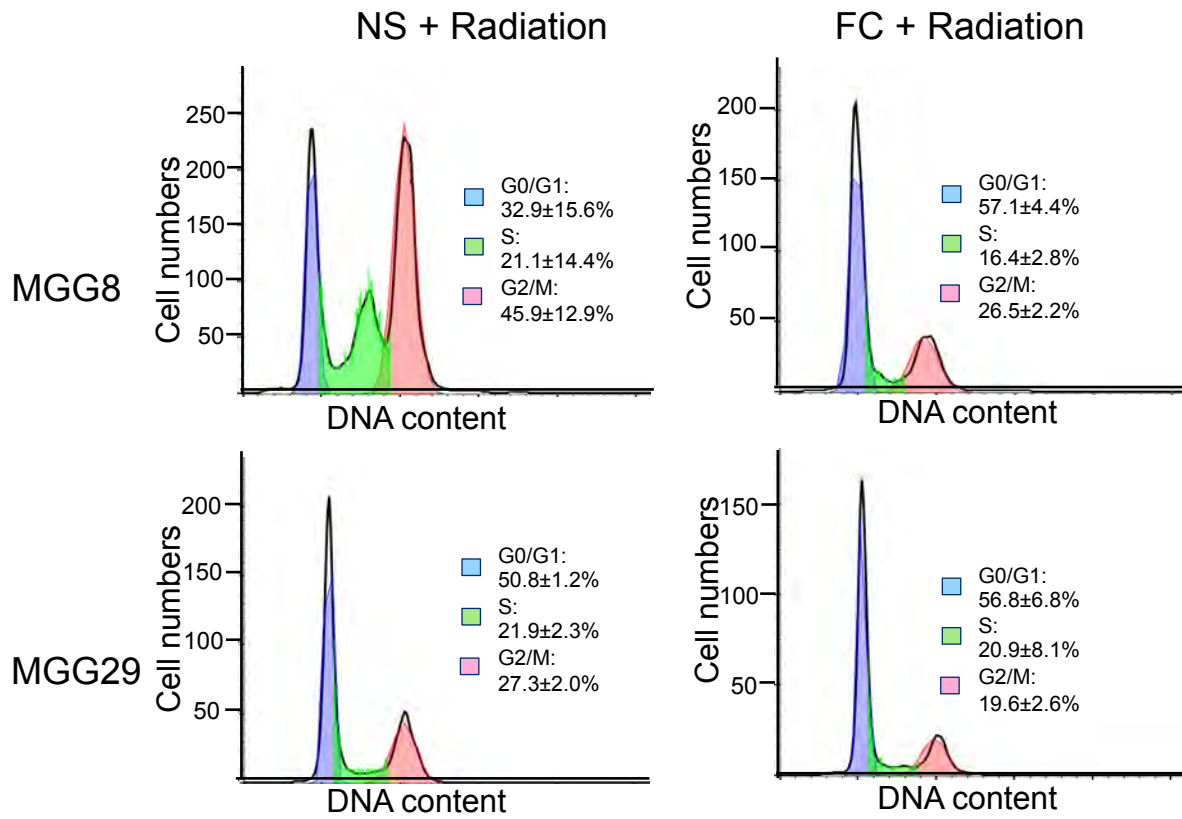

Fig. S11

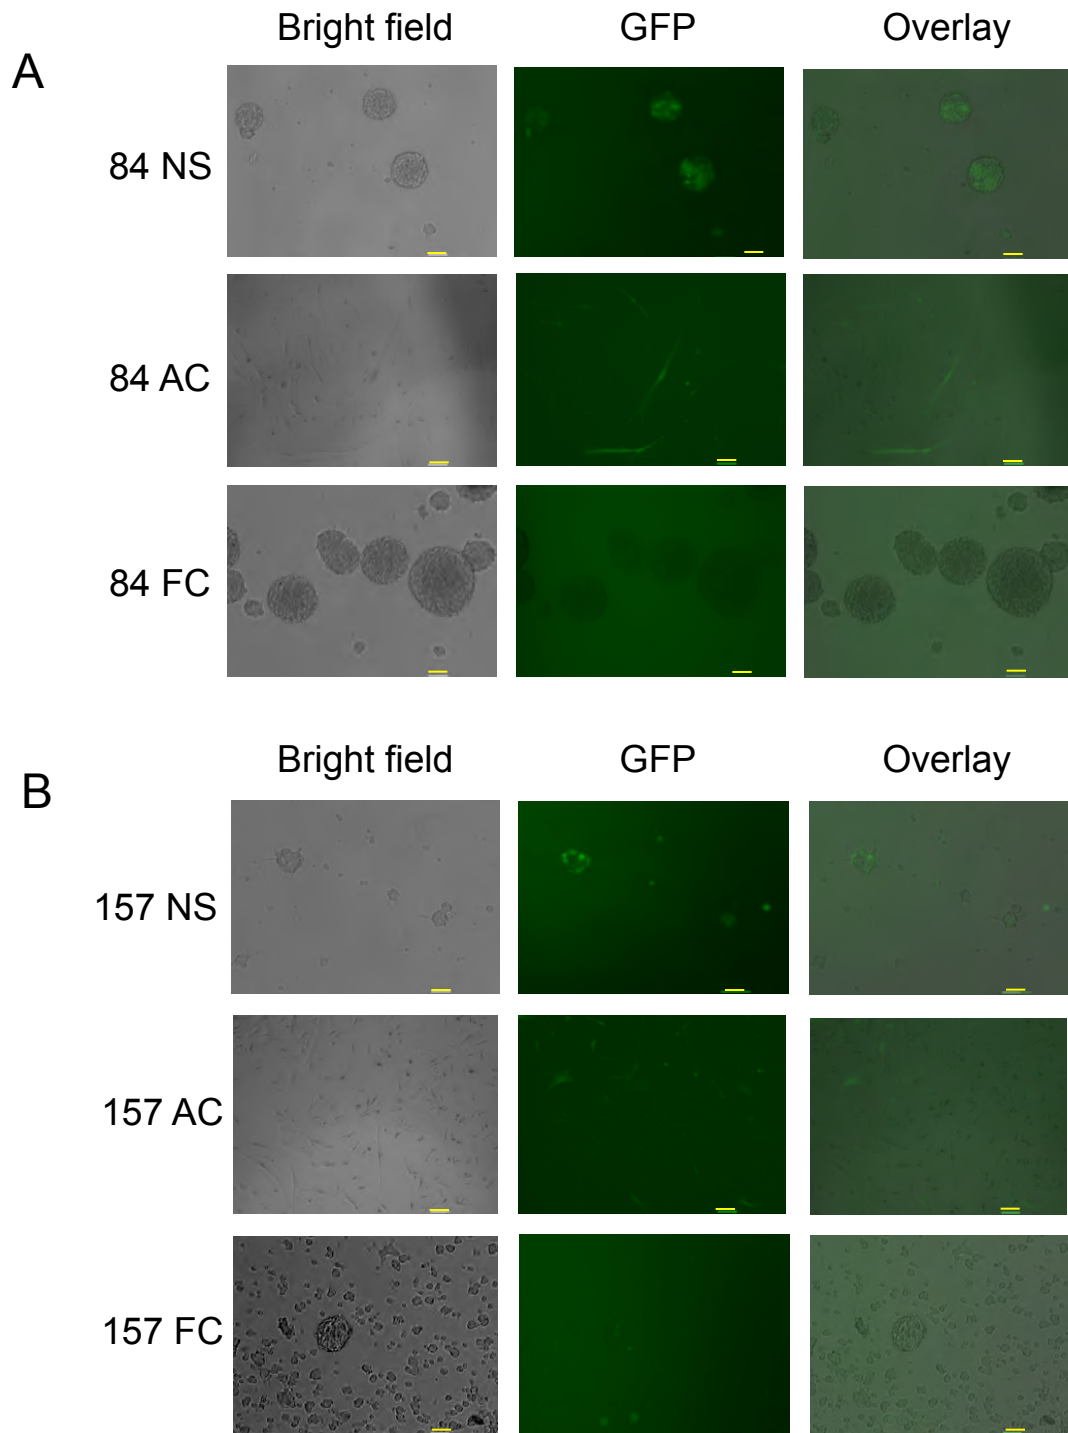

Supplement: now253_suppl_Supplementary_Figures.pdf [file now253_suppl_Supplementary_Figures.pdf]
